# Supplementary material for: Ecophysiology of Endangered Plant Species Saussurea esthonica: Effect of Mineral Nutrient Availability and Soil Moisture
Source: Plants (Basel). 2023 Feb 16;12(4):888. doi: 10.3390/plants12040888 (PMC9965748; doi:10.3390/plants12040888)
Supplement: Supplementary file 1 [file plants-12-00888-s001.zip › Saussurea Supplement 1.pdf]

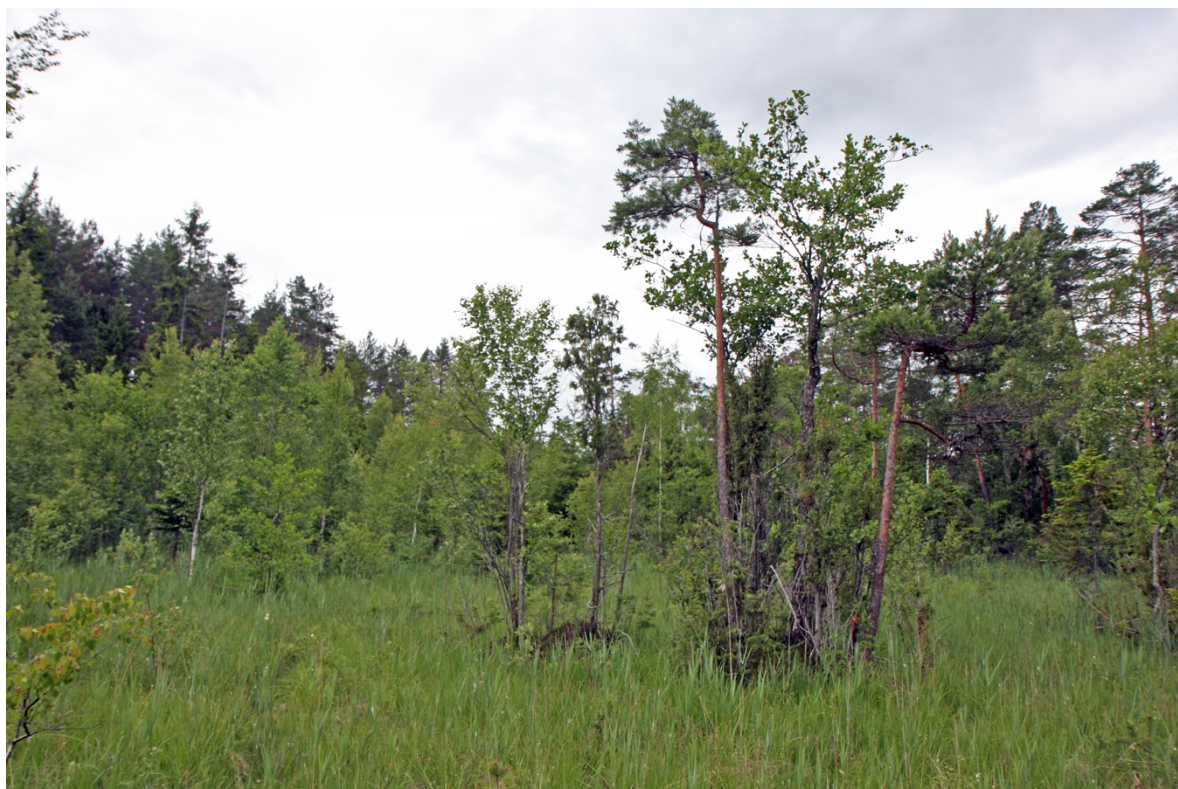

**Figure S1.** *Saussurea esthonica* sites in Latvia and Estonia, used in the present study.

**A,** site in Apšuciems, Latvia.

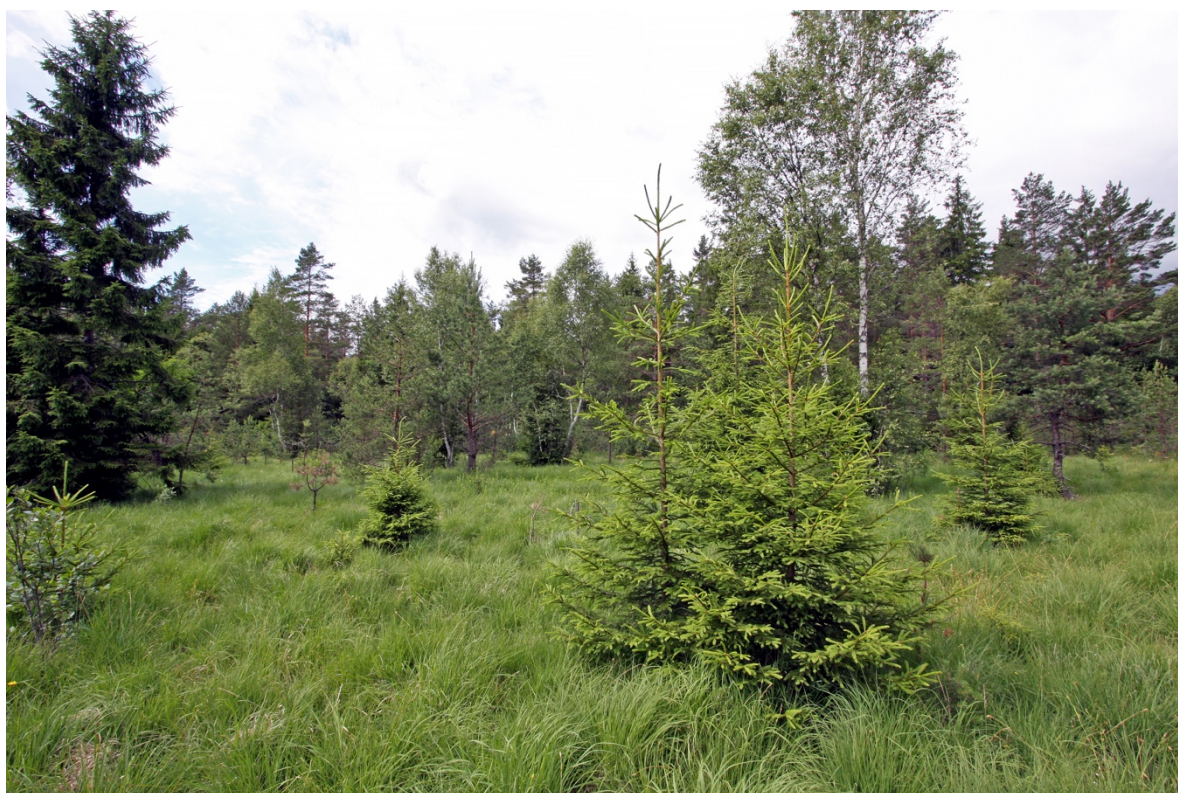

**B,** site in Pope, Latvia.

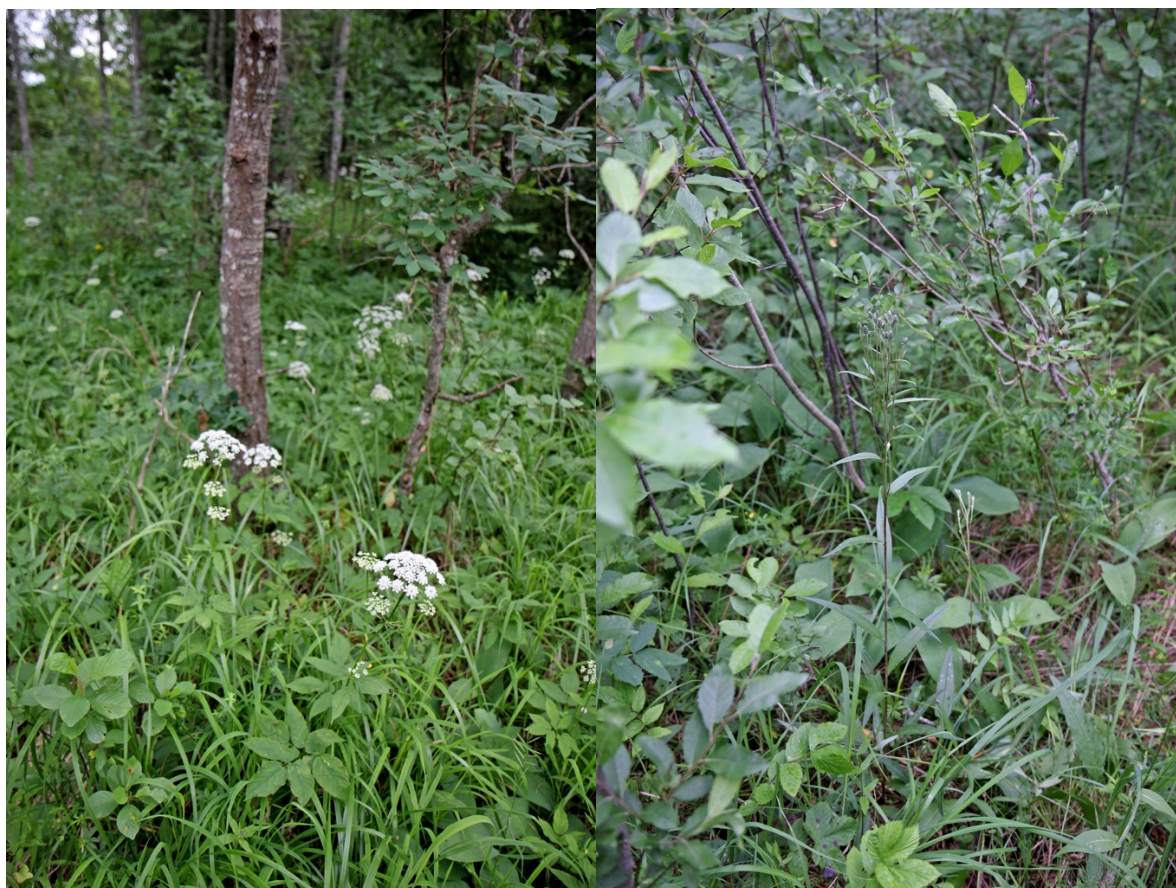

**C**, site in Pärnu-Jaagupi, Estonia.

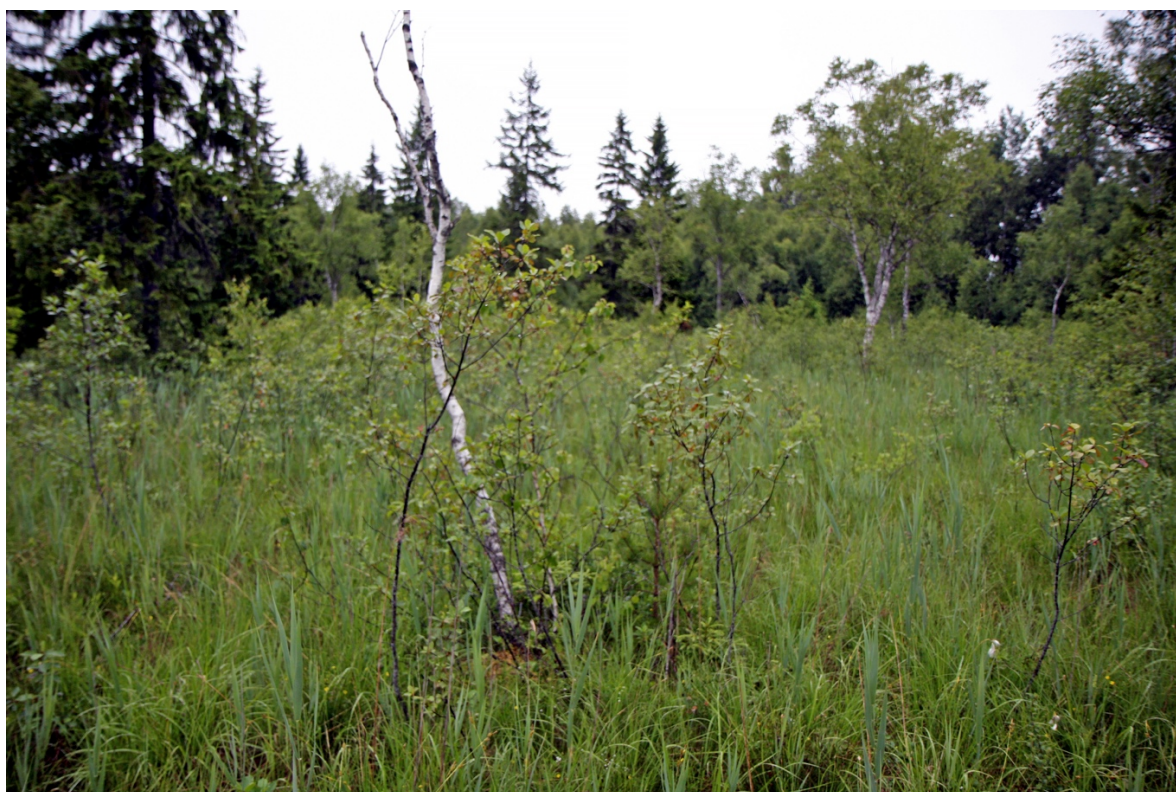

**D**, site in Kalevi, Estonia.

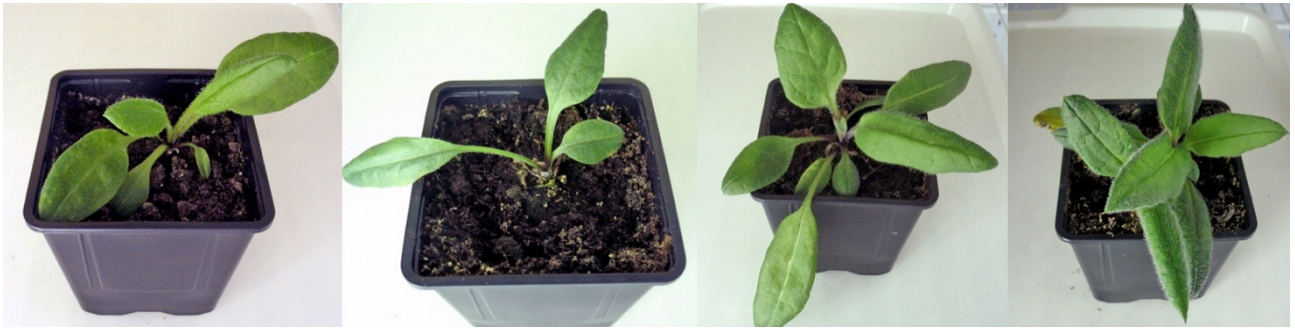

**Figure S2.** Typical *Saussurea esthonica* individuals in mineral nutrient experiment in controlled conditions. From left to right: control, "Apšuciems", "Pope", "Pope+".

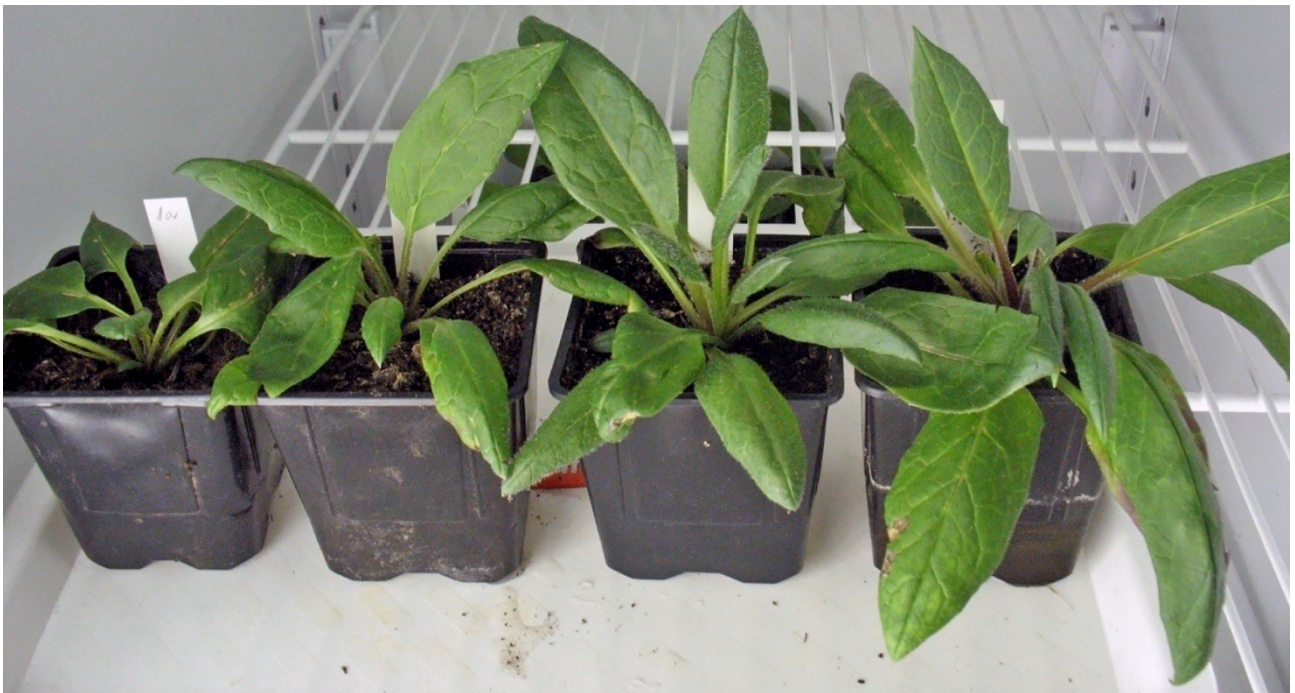

**Figure S3.** Typical *Saussurea esthonica* individuals in water availability experiment in controlled conditions. From left to right: 80, 100, 150, 200% substrate water content.
