# Supplementary material for: Ecophysiology of Endangered Plant Species Saussurea esthonica: Effect of Mineral Nutrient Availability and Soil Moisture
Source: Plants (Basel). 2023 Feb 16;12(4):888. doi: 10.3390/plants12040888 (PMC9965748; doi:10.3390/plants12040888)
Supplement: Supplementary file 1 [file plants-12-00888-s001.zip › Saussurea Supplement 2.pdf]

**Table S1.** Results of ANOVA analysis of photosynthesis-related parameters of *Saussurea esthonica* between sites, and vegetative (V) and generative (G) individuals. Statistically significant ( $p < 0.05$ ) interactions are indicated in bold. d.f., degrees of freedom.

| Site Interactions           | Chlorophyll Content |              | $F_v/F_m$    |              | Performance Index |              |
|-----------------------------|---------------------|--------------|--------------|--------------|-------------------|--------------|
|                             | <i>F</i>            | <i>p</i>     | <i>F</i>     | <i>p</i>     | <i>F</i>          | <i>p</i>     |
| 2009 (d.f. 5)               |                     |              |              |              |                   |              |
| Apšuciems G vs. Apšuciems V | 2.26                | 0.207        | 0.142        | 0.725        | 2.76              | 0.172        |
| Apšuciems G vs. Pope G      | <b>13.20</b>        | <b>0.022</b> | <b>9.54</b>  | <b>0.037</b> | <b>18.90</b>      | <b>0.012</b> |
| Apšuciems G vs. Pope V      | 0.89                | 0.399        | <b>32.60</b> | <b>0.005</b> | <b>28.50</b>      | <b>0.006</b> |
| Apšuciems V vs. Pope G      | 5.10                | 0.087        | <b>10.50</b> | <b>0.032</b> | <b>26.60</b>      | <b>0.007</b> |
| Apšuciems V vs. Pope V      | 0.69                | 0.452        | <b>30.10</b> | <b>0.005</b> | <b>40.80</b>      | <b>0.003</b> |
| Pope G vs. Pope V           | <b>11.50</b>        | <b>0.027</b> | 0.38         | 0.573        | 0.08              | 0.795        |
| 2010 (d.f. 7)               |                     |              |              |              |                   |              |
| Apšuciems G vs. Apšuciems V | 0.00                | 0.969        | 0.87         | 0.386        | 0.10              | 0.764        |
| Apšuciems G vs. Pope G      | 0.00                | 0.973        | 0.09         | 0.771        | 2.10              | 0.197        |
| Apšuciems G vs. Pope V      | 0.73                | 0.425        | 0.01         | 0.930        | 0.82              | 0.399        |
| Apšuciems V vs. Pope G      | 0.00                | 0.987        | 5.03         | 0.066        | <b>17.40</b>      | <b>0.006</b> |
| Apšuciems V vs. Pope V      | 0.72                | 0.427        | 3.29         | 0.120        | <b>6.04</b>       | <b>0.049</b> |
| Pope G vs. Pope V           | 7.34                | 0.117        | 0.41         | 0.548        | 1.65              | 0.247        |
| 2011 (d.f. 7)               |                     |              |              |              |                   |              |
| Apšuciems G vs. Apšuciems V | 0.01                | 0.950        | 1.910        | 0.217        | 2.80              | 0.145        |
| Apšuciems G vs. Pope G      | 4.01                | 0.092        | 3.570        | 0.108        | <b>6.04</b>       | <b>0.048</b> |
| Apšuciems G vs. Pope V      | 0.04                | 0.852        | 2.360        | 0.175        | 4.92              | 0.068        |
| Apšuciems V vs. Pope G      | 1.24                | 0.308        | <b>14.30</b> | <b>0.009</b> | <b>27.2</b>       | <b>0.002</b> |
| Apšuciems V vs. Pope V      | 0.01                | 0.938        | <b>14.20</b> | <b>0.009</b> | <b>23.1</b>       | <b>0.003</b> |
| Pope G vs. Pope V           | 2.02                | 0.205        | 0.28         | 0.613        | 0.07              | 0.797        |

**Table S2.** Results of ANOVA analysis of number of leaves and plant vitality index of *Saussurea esthonica* plants cultivated in substrate with different mineral nutrient composition. Degrees of freedom = 11.

| Soil Interactions        | Number of Leaves |              | Vitality Index |              |
|--------------------------|------------------|--------------|----------------|--------------|
|                          | <i>F</i>         | <i>p</i>     | <i>F</i>       | <i>p</i>     |
| Control vs. "Apšuciems " | <b>23.13</b>     | <b>0.001</b> | 2.93           | 0.125        |
| Control vs. "Pope"       | 3.10             | 0.116        | 4.72           | 0.062        |
| Control vs. "Pope+"      | <b>5.46</b>      | <b>0.048</b> | <b>11.70</b>   | <b>0.009</b> |
| "Apšuciems " vs. "Pope"  | <b>14.86</b>     | <b>0.005</b> | <b>8.60</b>    | <b>0.019</b> |
| "Apšuciems " vs. "Pope+" | <b>23.12</b>     | <b>0.001</b> | <b>16.65</b>   | <b>0.004</b> |
| "Pope" vs. "Pope+"       | 0.24             | 0.636        | 0.17           | 0.688        |

**Table S3.** Results of ANOVA analysis of photosynthesis-related parameters of *Saussurea esthonica* plants cultivated in substrate with different mineral nutrient composition. Degrees of freedom = 25.

| Soil Interactions        | Chlorophyll Content |                  | Performance Index |              | F <sub>v</sub> /F <sub>m</sub> |                  | RC/ABS      |              | F <sub>v</sub> /F <sub>0</sub> |                  |
|--------------------------|---------------------|------------------|-------------------|--------------|--------------------------------|------------------|-------------|--------------|--------------------------------|------------------|
|                          | <i>F</i>            | <i>p</i>         | <i>F</i>          | <i>p</i>     | <i>F</i>                       | <i>p</i>         | <i>F</i>    | <i>p</i>     | <i>F</i>                       | <i>p</i>         |
| Control vs. "Apšuciems " | <b>69.40</b>        | <b>&lt;0.001</b> | 0.41              | 0.532        | <b>5.76</b>                    | <b>0.026</b>     | 0.03        | 0.864        | 4.21                           | 0.054            |
| Control vs. "Pope"       | <b>5.40</b>         | <b>0.032</b>     | 0.84              | 0.371        | 4.21                           | 0.054            | 0.01        | 0.134        | 4.62                           | 0.094            |
| Control vs. "Pope+"      | <b>21.50</b>        | <b>&lt;0.001</b> | <b>8.64</b>       | <b>0.008</b> | <b>7.93</b>                    | <b>0.011</b>     | <b>6.71</b> | <b>0.018</b> | <b>11.20</b>                   | <b>0.003</b>     |
| "Apšuciems " vs. "Pope"  | <b>7.10</b>         | <b>0.015</b>     | 2.04              | 0.169        | <b>14.80</b>                   | <b>0.001</b>     | 0.00        | 0.975        | <b>14.60</b>                   | <b>0.001</b>     |
| "Apšuciems " vs. "Pope+" | 0.77                | 0.389            | <b>11.70</b>      | <b>0.003</b> | <b>18.90</b>                   | <b>&lt;0.001</b> | <b>6.85</b> | <b>0.017</b> | <b>23.40</b>                   | <b>&lt;0.001</b> |
| "Pope" vs. "Pope+"       | 2.37                | 0.139            | 3.84              | 0.074        | 1.13                           | 0.300            | 4.18        | 0.054        | 0.99                           | 0.331            |

**Table S4.** Results of ANOVA analysis of number of leaves and plant vitality index of *Saussurea esthonica* plants cultivated in substrate with different water availability. Degrees of freedom = 11.

| Moisture Interactions | Number of Leaves |              | Vitality Index |              |
|-----------------------|------------------|--------------|----------------|--------------|
|                       | <i>F</i>         | <i>p</i>     | <i>F</i>       | <i>p</i>     |
| 80% vs. 100%          | <b>6.38</b>      | <b>0.030</b> | 2.09           | 0.179        |
| 80% vs. 150%          | <b>16.70</b>     | <b>0.027</b> | <b>21.40</b>   | <b>0.001</b> |
| 80% vs. 200%          | <b>12.10</b>     | <b>0.006</b> | <b>17.80</b>   | <b>0.002</b> |
| 100% vs. 150%         | <b>10.70</b>     | <b>0.009</b> | <b>16.00</b>   | <b>0.003</b> |
| 100% vs. 200%         | <b>5.59</b>      | <b>0.040</b> | <b>11.90</b>   | <b>0.001</b> |
| 150% vs. 200%         | 2.84             | 0.123        | <b>5.19</b>    | <b>0.046</b> |

**Table S5.** Results of ANOVA analysis of photosynthesis-related parameters of *Saussurea esthonica* plants cultivated in substrate with different water availability. Degrees of freedom = 25.

| Moisture Interactions | Chlorophyll Content |                  | Performance Index |                  | F <sub>v</sub> /F <sub>m</sub> |                  | RC/ABS       |                  | F <sub>v</sub> /F <sub>0</sub> |                  |
|-----------------------|---------------------|------------------|-------------------|------------------|--------------------------------|------------------|--------------|------------------|--------------------------------|------------------|
|                       | <i>F</i>            | <i>p</i>         | <i>F</i>          | <i>p</i>         | <i>F</i>                       | <i>p</i>         | <i>F</i>     | <i>p</i>         | <i>F</i>                       | <i>p</i>         |
| 80% vs. 100%          | <b>23.30</b>        | <b>&lt;0.001</b> | <b>19.40</b>      | <b>0.001</b>     | <b>42.30</b>                   | <b>&lt;0.001</b> | <b>27.20</b> | <b>&lt;0.001</b> | <b>33.30</b>                   | <b>&lt;0.001</b> |
| 80% vs. 150%          | <b>34.10</b>        | <b>&lt;0.001</b> | <b>16.10</b>      | <b>0.001</b>     | 0.85                           | 0.365            | <b>31.90</b> | <b>&lt;0.001</b> | 0.77                           | 0.390            |
| 80% vs. 200%          | 3.90                | 0.059            | 0.96              | 0.340            | <b>22.40</b>                   | <b>&lt;0.001</b> | 2.10         | 0.160            | <b>17.90</b>                   | <b>&lt;0.001</b> |
| 100% vs. 150%         | 0.20                | 0.660            | <b>23.40</b>      | <b>&lt;0.001</b> | <b>29.30</b>                   | <b>&lt;0.001</b> | 0.06         | 0.818            | <b>46.60</b>                   | <b>&lt;0.001</b> |
| 100% vs. 200%         | <b>11.70</b>        | <b>0.002</b>     | <b>23.40</b>      | <b>&lt;0.001</b> | 0.59                           | 0.451            | <b>19.80</b> | <b>&lt;0.001</b> | 0.50                           | 0.485            |
| 150% vs. 200%         | <b>19.00</b>        | <b>0.002</b>     | <b>25.30</b>      | <b>&lt;0.001</b> | <b>14.80</b>                   | <b>0.001</b>     | <b>23.90</b> | <b>&lt;0.001</b> | <b>25.30</b>                   | <b>&lt;0.001</b> |
